# Supplementary material for: Identification of candidate regulators of the response to early heat stress in climate-adapted wheat landraces via transcriptomic and co-expression network analyses
Source: Front Plant Sci. 2024 Jan 3;14:1252885. doi: 10.3389/fpls.2023.1252885 (PMC10791870; doi:10.3389/fpls.2023.1252885)
Supplement: Supplementary file 2 [file DataSheet_1.xlsx]

## Sheet: Data S1_Information on accessio
Supplementary Data S1: Landrace accessions from the YoGI panel, screened previously for thermotolerance, used for transcriptomic analysis in the present work.
Taxa	Tolerance	Accession ID	Accession Name	Origin	Cultivar_ID
YoGI_033	Susceptible	CWI 9391	PI 250413	Pakistan	CWI 9391_PI 250413
YoGI_048	Tolerant	CWI 13434	INDIAN	United States	CWI 13434_INDIAN
YoGI_050	Susceptible	CWI 13561	WHITE-RUSSIAN	China	CWI 13561_WHITE-RUSSIAN
YoGI_055	Susceptible	CWI 13661	RED EGYPTIAN	Egypt	CWI 13661_RED EGYPTIAN
YoGI_057	Tolerant	CWI 13719	PURPLESTRAW	Canada	CWI 13719_PURPLESTRAW
YoGI_083	Tolerant	1190004	Rustam Exp Farm 99	Iraq	1190004_Rustam Exp Farm 99
YoGI_086	Susceptible	1190021	Boojri	India	1190021_Boojri
YoGI_155	Tolerant	1190264		Canary Islands	1190264_
YoGI_235	Tolerant	1190627		Iran	1190627_
YoGI_268	Susceptible	1190732	Gahu (Nepali) or Kyo (Sikkimese)	India	1190732_Gahu (Nepali) or Kyo (Sikkimese)
YoGI_292	Tolerant	1190788		USSR	1190788_
YoGI_310	Susceptible	01C0203425	Cordillera 3	Paraguay	01C0203425_ Cordillera 3
YoGI_324	Tolerant	01C0202172	MCB 192	Peru	01C0202172_ MCB 192
