# Supplementary material for: Identification of candidate regulators of the response to early heat stress in climate-adapted wheat landraces via transcriptomic and co-expression network analyses
Source: Front Plant Sci. 2024 Jan 3;14:1252885. doi: 10.3389/fpls.2023.1252885 (PMC10791870; doi:10.3389/fpls.2023.1252885)
Supplement: Supplementary file 6 [file DataSheet_5.xlsx]

## Sheet: Data S4_Coexpression network ge
Data S5: Genes included in co-expression network construction, and their module membership.
Gene	Module
TraesCS1A02G000100	red
TraesCS1A02G000200	grey
TraesCS1A02G000300	greenyellow
TraesCS1A02G000400	midnightblue
TraesCS1A02G000500	darkgreen
TraesCS1A02G000600	blue
TraesCS1A02G000700	darkolivegreen
TraesCS1A02G000800	green
TraesCS1A02G000900	purple
TraesCS1A02G001000	saddlebrown
TraesCS1A02G001100	steelblue
TraesCS1A02G001200	darkmagenta
TraesCS1A02G001300	grey
TraesCS1A02G001400	lightyellow
TraesCS1A02G001500	grey
TraesCS1A02G001600	tan
TraesCS1A02G001700	red
TraesCS1A02G001800	grey
TraesCS1A02G001900	turquoise
TraesCS1A02G002000	midnightblue
TraesCS1A02G002100	turquoise
TraesCS1A02G002200	grey60
TraesCS1A02G002300	yellowgreen
TraesCS1A02G002400	skyblue3
TraesCS1A02G002500	honeydew1
TraesCS1A02G002700	yellow
TraesCS1A02G002900	lightcyan
TraesCS1A02G003000	blue
TraesCS1A02G003100	midnightblue
TraesCS1A02G003200	blue
TraesCS1A02G003500	magenta
TraesCS1A02G003546	purple
TraesCS1A02G003700	royalblue
TraesCS1A02G003900	lightcyan
TraesCS1A02G004000	cyan
TraesCS1A02G004100	purple
TraesCS1A02G004126	saddlebrown
TraesCS1A02G004200	blue
TraesCS1A02G004400	midnightblue
TraesCS1A02G004500	midnightblue
TraesCS1A02G004800	purple
TraesCS1A02G004900	cyan
TraesCS1A02G005000	grey
TraesCS1A02G005100	turquoise
TraesCS1A02G005200	turquoise
TraesCS1A02G005300	lightyellow
TraesCS1A02G005400	tan
TraesCS1A02G005500	lightgreen
TraesCS1A02G005600	yellow
TraesCS1A02G005700	yellow
TraesCS1A02G005800	lightgreen
TraesCS1A02G005900	grey
TraesCS1A02G006000	blue
TraesCS1A02G006200	magenta
TraesCS1A02G006300	brown
TraesCS1A02G006400	red
TraesCS1A02G006500	brown
TraesCS1A02G006700	skyblue3
TraesCS1A02G006800	brown
TraesCS1A02G006900	green
TraesCS1A02G007000	magenta
TraesCS1A02G007100	saddlebrown
TraesCS1A02G007300	black
TraesCS1A02G007500	turquoise
TraesCS1A02G007800	turquoise
TraesCS1A02G007900	yellowgreen
TraesCS1A02G008100	blue
TraesCS1A02G008200	red
TraesCS1A02G008300	lightyellow
TraesCS1A02G008400	green
TraesCS1A02G008500	green
TraesCS1A02G008600	midnightblue
TraesCS1A02G009000	turquoise
TraesCS1A02G009100	turquoise
TraesCS1A02G009200	red
TraesCS1A02G009300	blue
TraesCS1A02G009320	thistle2
TraesCS1A02G009400	lightpink4
TraesCS1A02G009500	red
TraesCS1A02G009600	antiquewhite4
TraesCS1A02G009900	red
TraesCS1A02G010100	red
TraesCS1A02G010200	thistle2
TraesCS1A02G010300	red
TraesCS1A02G010400	red
TraesCS1A02G010600	royalblue
TraesCS1A02G010700	blue
TraesCS1A02G010800	royalblue
TraesCS1A02G011100	greenyellow
TraesCS1A02G011200	ivory
TraesCS1A02G011300	red
TraesCS1A02G011400	blue
TraesCS1A02G011500	brown
TraesCS1A02G011600	yellow
TraesCS1A02G011700	magenta
TraesCS1A02G011800	blue
TraesCS1A02G011900	turquoise
TraesCS1A02G012000	yellow
TraesCS1A02G012100	turquoise
TraesCS1A02G012300	lightyellow
TraesCS1A02G012400	purple
TraesCS1A02G012500	turquoise
TraesCS1A02G012600	brown
TraesCS1A02G012700	brown
TraesCS1A02G012800	brown
TraesCS1A02G012900	brown
TraesCS1A02G013000	brown
TraesCS1A02G013600	green
TraesCS1A02G013700	red
TraesCS1A02G013800	grey
TraesCS1A02G013900	salmon
TraesCS1A02G014100	green
TraesCS1A02G014300	bisque4
TraesCS1A02G014500	cyan
TraesCS1A02G014900	blue
TraesCS1A02G015000	floralwhite
TraesCS1A02G015100	grey
TraesCS1A02G015200	mediumpurple3
TraesCS1A02G015300	grey
TraesCS1A02G015378	purple
TraesCS1A02G015400	lightgreen
TraesCS1A02G015500	steelblue
TraesCS1A02G015600	blue
TraesCS1A02G015700	royalblue
TraesCS1A02G015800	blue
TraesCS1A02G015900	white
TraesCS1A02G016000	grey
TraesCS1A02G016100	red
TraesCS1A02G016200	yellow
TraesCS1A02G016203	lightgreen
TraesCS1A02G016300	red
TraesCS1A02G016400	tan
TraesCS1A02G016900	cyan
TraesCS1A02G017000	lightyellow
TraesCS1A02G017100	midnightblue
TraesCS1A02G017200	tan
TraesCS1A02G017400	skyblue
TraesCS1A02G017500	salmon
TraesCS1A02G017700	tan
TraesCS1A02G017800	green
TraesCS1A02G017900	paleturquoise
TraesCS1A02G018000	salmon
TraesCS1A02G018100	red
TraesCS1A02G018300	skyblue
TraesCS1A02G018400	turquoise
TraesCS1A02G018500	red
TraesCS1A02G018600	grey
TraesCS1A02G018700	brown
TraesCS1A02G018800	blue
TraesCS1A02G018900	blue
TraesCS1A02G019000	grey
TraesCS1A02G019100	sienna3
TraesCS1A02G019200	turquoise
TraesCS1A02G019500	cyan
TraesCS1A02G019600	turquoise
TraesCS1A02G020000	yellow4
TraesCS1A02G020300	blue
TraesCS1A02G020400	midnightblue
TraesCS1A02G020500	yellow
TraesCS1A02G020600	turquoise
TraesCS1A02G020700	midnightblue
TraesCS1A02G020800	lightyellow
TraesCS1A02G020900	turquoise
TraesCS1A02G021000	red
TraesCS1A02G021100	purple
TraesCS1A02G021200	midnightblue
TraesCS1A02G021400	salmon
TraesCS1A02G021700	blue
TraesCS1A02G021800	midnightblue
TraesCS1A02G022500	tan
TraesCS1A02G022600	cyan
TraesCS1A02G022900	green
TraesCS1A02G023100	tan
TraesCS1A02G023200	blue
TraesCS1A02G023205	blue
TraesCS1A02G023300	darkolivegreen
TraesCS1A02G023400	yellow
TraesCS1A02G023500	purple
TraesCS1A02G023600	midnightblue
TraesCS1A02G023700	grey
TraesCS1A02G023800	turquoise
TraesCS1A02G024200	cyan
TraesCS1A02G024300	greenyellow
TraesCS1A02G024400	turquoise
TraesCS1A02G024500	plum1
TraesCS1A02G024600	darkred
TraesCS1A02G024700	darkred
TraesCS1A02G024900	magenta
TraesCS1A02G025100	turquoise
TraesCS1A02G025200	black
TraesCS1A02G025400	greenyellow
TraesCS1A02G025500	black
TraesCS1A02G025600	darkorange
TraesCS1A02G025700	navajowhite2
TraesCS1A02G025800	brown
TraesCS1A02G025900	yellow
TraesCS1A02G026000	cyan
TraesCS1A02G026100	cyan
TraesCS1A02G026200	grey60
TraesCS1A02G026300	grey
TraesCS1A02G026400	lightcyan
TraesCS1A02G026700	cyan
TraesCS1A02G026800	tan
TraesCS1A02G026900	blue
TraesCS1A02G027000	greenyellow
TraesCS1A02G027200	turquoise
TraesCS1A02G027300	blue
TraesCS1A02G027400	lightcyan
TraesCS1A02G027500	midnightblue
TraesCS1A02G027600	magenta
TraesCS1A02G027700	magenta
TraesCS1A02G027800	magenta
TraesCS1A02G027900	magenta
TraesCS1A02G028200	blue
TraesCS1A02G028300	midnightblue
TraesCS1A02G028400	grey60
TraesCS1A02G028500	lightgreen
TraesCS1A02G028600	red
TraesCS1A02G028700	greenyellow
TraesCS1A02G028900	greenyellow
TraesCS1A02G029100	blue
TraesCS1A02G029200	turquoise
TraesCS1A02G029300	turquoise
TraesCS1A02G029400	greenyellow
TraesCS1A02G029700	brown
TraesCS1A02G029800	black
TraesCS1A02G030000	grey
TraesCS1A02G030100	turquoise
TraesCS1A02G030200	blue
TraesCS1A02G030300	turquoise
TraesCS1A02G030400	turquoise
TraesCS1A02G030500	turquoise
TraesCS1A02G030600	grey60
TraesCS1A02G030700	greenyellow
TraesCS1A02G030900	tan
TraesCS1A02G031200	yellow
TraesCS1A02G031300	skyblue3
TraesCS1A02G031400	skyblue
TraesCS1A02G031600	darkolivegreen
TraesCS1A02G031700	royalblue
TraesCS1A02G031800	midnightblue
TraesCS1A02G031900	royalblue
TraesCS1A02G032200	darkmagenta
TraesCS1A02G032500	yellow
TraesCS1A02G032600	green
TraesCS1A02G032700	lightyellow
TraesCS1A02G032900	skyblue
TraesCS1A02G033000	tan
TraesCS1A02G033100	turquoise
TraesCS1A02G033200	salmon
TraesCS1A02G033300	tan
TraesCS1A02G033400	blue
TraesCS1A02G033500	pink
TraesCS1A02G033501	green
TraesCS1A02G033600	royalblue
TraesCS1A02G033700	honeydew1
TraesCS1A02G033800	blue
TraesCS1A02G034000	salmon
TraesCS1A02G034100	green
TraesCS1A02G034300	turquoise
TraesCS1A02G034400	skyblue3
TraesCS1A02G034600	blue
TraesCS1A02G034700	blue
TraesCS1A02G035000	turquoise
TraesCS1A02G035100	salmon
TraesCS1A02G035200	blue
TraesCS1A02G035300	turquoise
TraesCS1A02G035400	midnightblue
TraesCS1A02G035500	blue
TraesCS1A02G035600	darkgreen
TraesCS1A02G035700	salmon
TraesCS1A02G035800	grey
TraesCS1A02G035900	yellow
TraesCS1A02G036100	turquoise
TraesCS1A02G036200	turquoise
TraesCS1A02G036300	grey
TraesCS1A02G036500	turquoise
TraesCS1A02G036700	green
TraesCS1A02G036800	turquoise
TraesCS1A02G037000	blue
TraesCS1A02G037100	tan
TraesCS1A02G037300	green
TraesCS1A02G037400	darkslateblue
TraesCS1A02G037500	black
TraesCS1A02G037700	red
TraesCS1A02G037800	salmon
TraesCS1A02G037900	grey
TraesCS1A02G038200	lightcyan
TraesCS1A02G038300	red
TraesCS1A02G038400	turquoise
TraesCS1A02G038500	darkorange
TraesCS1A02G038600	tan
TraesCS1A02G038800	turquoise
TraesCS1A02G039000	steelblue
TraesCS1A02G039100	lightsteelblue1
TraesCS1A02G039200	turquoise
TraesCS1A02G039400	turquoise
TraesCS1A02G039800	plum1
TraesCS1A02G039900	purple
TraesCS1A02G040000	red
TraesCS1A02G040300	magenta
TraesCS1A02G040400	purple
TraesCS1A02G040500	sienna3
TraesCS1A02G040600	turquoise
TraesCS1A02G040700	blue
TraesCS1A02G041000	skyblue
TraesCS1A02G041100	lightgreen
TraesCS1A02G041200	green
TraesCS1A02G041300	green
TraesCS1A02G041400	red
TraesCS1A02G041500	red
TraesCS1A02G041900	magenta
TraesCS1A02G042100	purple
TraesCS1A02G042300	cyan
TraesCS1A02G042500	red
TraesCS1A02G042700	turquoise
TraesCS1A02G042800	magenta
TraesCS1A02G042900	skyblue
TraesCS1A02G043200	grey
TraesCS1A02G043300	darkturquoise
TraesCS1A02G043400	turquoise
TraesCS1A02G043600	yellow
TraesCS1A02G043700	turquoise
TraesCS1A02G043900	darkgreen
TraesCS1A02G044000	brown
TraesCS1A02G044100	brown
TraesCS1A02G044200	turquoise
TraesCS1A02G044300	cyan
TraesCS1A02G044500	grey60
TraesCS1A02G044600	turquoise
TraesCS1A02G044800	mediumpurple3
TraesCS1A02G045300	yellow
TraesCS1A02G045400	yellow
TraesCS1A02G045700	turquoise
TraesCS1A02G045800	sienna3
TraesCS1A02G046100	turquoise
TraesCS1A02G046300	turquoise
TraesCS1A02G046400	lightcyan
TraesCS1A02G046500	purple
TraesCS1A02G046600	turquoise
TraesCS1A02G046700	brown
TraesCS1A02G046800	blue
TraesCS1A02G046900	yellow
TraesCS1A02G047000	turquoise
TraesCS1A02G047200	midnightblue
TraesCS1A02G047300	red
TraesCS1A02G047500	turquoise
TraesCS1A02G047700	darkred
TraesCS1A02G048000	darkgreen
TraesCS1A02G048100	brown
TraesCS1A02G048200	lightyellow
TraesCS1A02G048300	lightcyan
TraesCS1A02G048400	lightyellow
TraesCS1A02G048500	tan
TraesCS1A02G048600	turquoise
TraesCS1A02G048700	darkgreen
TraesCS1A02G049000	blue
TraesCS1A02G049100	skyblue
TraesCS1A02G049200	salmon
TraesCS1A02G049300	turquoise
TraesCS1A02G049400	steelblue
TraesCS1A02G049500	magenta
TraesCS1A02G049600	brown
TraesCS1A02G049700	turquoise
TraesCS1A02G049900	lightyellow
TraesCS1A02G050100	turquoise
TraesCS1A02G050200	brown
TraesCS1A02G050300	turquoise
TraesCS1A02G050400	saddlebrown
TraesCS1A02G050700	midnightblue
TraesCS1A02G050900	lightcyan
TraesCS1A02G051000	tan
TraesCS1A02G051100	turquoise
TraesCS1A02G051200	bisque4
TraesCS1A02G051300	cyan
TraesCS1A02G051400	turquoise
TraesCS1A02G051500	yellow
TraesCS1A02G051600	turquoise
TraesCS1A02G051700	grey60
TraesCS1A02G051800	skyblue3
TraesCS1A02G051900	blue
TraesCS1A02G052100	green
TraesCS1A02G052200	yellow
TraesCS1A02G052300	grey
TraesCS1A02G052400	turquoise
TraesCS1A02G052500	salmon
TraesCS1A02G053200	purple
TraesCS1A02G053600	darkred
TraesCS1A02G053700	skyblue
TraesCS1A02G054000	turquoise
TraesCS1A02G054300	saddlebrown
TraesCS1A02G054400	grey
TraesCS1A02G054500	turquoise
TraesCS1A02G054700	turquoise
TraesCS1A02G054800	sienna3
TraesCS1A02G054900	turquoise
TraesCS1A02G055000	turquoise
TraesCS1A02G055200	grey60
TraesCS1A02G055400	mediumpurple3
TraesCS1A02G055500	brown
TraesCS1A02G055600	turquoise
TraesCS1A02G055800	turquoise
TraesCS1A02G056000	turquoise
TraesCS1A02G056100	turquoise
TraesCS1A02G056105	brown
TraesCS1A02G056200	turquoise
TraesCS1A02G056400	purple
TraesCS1A02G056500	turquoise
TraesCS1A02G056600	brown
TraesCS1A02G056700	salmon
TraesCS1A02G056800	black
TraesCS1A02G056900	lightcyan1
TraesCS1A02G057000	greenyellow
TraesCS1A02G057100	turquoise
TraesCS1A02G057200	turquoise
TraesCS1A02G057300	blue
TraesCS1A02G057400	turquoise
TraesCS1A02G057500	brown
TraesCS1A02G057700	darkorange2
TraesCS1A02G057900	tan
TraesCS1A02G058000	purple
TraesCS1A02G058200	red
TraesCS1A02G058300	turquoise
TraesCS1A02G058400	pink
TraesCS1A02G058500	darkred
TraesCS1A02G058600	tan
TraesCS1A02G058700	salmon
TraesCS1A02G058900	turquoise
TraesCS1A02G059100	red
TraesCS1A02G059200	brown
TraesCS1A02G059500	magenta
TraesCS1A02G059800	orangered3
TraesCS1A02G059900	purple
TraesCS1A02G060100	turquoise
TraesCS1A02G060200	darkred
TraesCS1A02G060500	turquoise
TraesCS1A02G060600	grey
TraesCS1A02G060700	turquoise
TraesCS1A02G060800	turquoise
TraesCS1A02G061300	red
TraesCS1A02G061700	turquoise
TraesCS1A02G061900	blue
TraesCS1A02G062100	turquoise
TraesCS1A02G062200	tan
TraesCS1A02G062400	purple
TraesCS1A02G062800	blue
TraesCS1A02G063300	turquoise
TraesCS1A02G063500	turquoise
TraesCS1A02G063600	saddlebrown
TraesCS1A02G064000	darkgrey
TraesCS1A02G064100	turquoise
TraesCS1A02G064500	midnightblue
TraesCS1A02G064700	lightyellow
TraesCS1A02G064800	blue
TraesCS1A02G064900	blue
TraesCS1A02G065000	blue
TraesCS1A02G065200	blue
TraesCS1A02G065300	brown
TraesCS1A02G065400	darkslateblue
TraesCS1A02G065500	yellow
TraesCS1A02G065600	turquoise
TraesCS1A02G065700	yellow
TraesCS1A02G065800	greenyellow
TraesCS1A02G065900	lightcyan
TraesCS1A02G066000	turquoise
TraesCS1A02G066200	darkgrey
TraesCS1A02G066300	yellow
TraesCS1A02G066400	turquoise
TraesCS1A02G066500	darkolivegreen
TraesCS1A02G066521	green
TraesCS1A02G066600	turquoise
TraesCS1A02G066700	darkmagenta
TraesCS1A02G066800	blue
TraesCS1A02G066900	pink
TraesCS1A02G067000	tan
TraesCS1A02G067100	blue
TraesCS1A02G067200	turquoise
TraesCS1A02G067300	turquoise
TraesCS1A02G067400	turquoise
TraesCS1A02G067462	yellow
TraesCS1A02G067472	turquoise
TraesCS1A02G067600	turquoise
TraesCS1A02G067700	blue
TraesCS1A02G067800	turquoise
TraesCS1A02G067900	turquoise
TraesCS1A02G068000	turquoise
TraesCS1A02G068100	turquoise
TraesCS1A02G068200	purple
TraesCS1A02G068300	yellow
TraesCS1A02G068400	black
TraesCS1A02G068500	purple
TraesCS1A02G068600	lightyellow
TraesCS1A02G068700	purple
TraesCS1A02G069100	tan
TraesCS1A02G069300	paleturquoise
TraesCS1A02G069400	grey60
TraesCS1A02G069500	turquoise
TraesCS1A02G069600	black
TraesCS1A02G069700	turquoise
TraesCS1A02G069800	tan
TraesCS1A02G069900	turquoise
TraesCS1A02G070100	turquoise
TraesCS1A02G070200	greenyellow
TraesCS1A02G070300	turquoise
TraesCS1A02G070400	black
TraesCS1A02G070500	blue
TraesCS1A02G070600	black
TraesCS1A02G070700	darkorange2
TraesCS1A02G070800	turquoise
TraesCS1A02G070900	turquoise
TraesCS1A02G071100	blue
TraesCS1A02G071200	white
TraesCS1A02G071300	turquoise
TraesCS1A02G071400	brown
TraesCS1A02G071500	saddlebrown
TraesCS1A02G071600	midnightblue
TraesCS1A02G071657	ivory
TraesCS1A02G071700	skyblue3
TraesCS1A02G071800	red
TraesCS1A02G072000	brown
TraesCS1A02G072100	black
TraesCS1A02G072200	black
TraesCS1A02G072400	brown
TraesCS1A02G072600	grey60
TraesCS1A02G072800	tan
TraesCS1A02G072982	purple
TraesCS1A02G072986	purple
TraesCS1A02G073000	bisque4
TraesCS1A02G073100	turquoise
TraesCS1A02G073200	turquoise
TraesCS1A02G073300	yellow
TraesCS1A02G073400	turquoise
TraesCS1A02G073500	turquoise
TraesCS1A02G073600	turquoise
TraesCS1A02G073700	purple
TraesCS1A02G073800	red
TraesCS1A02G073900	lightyellow
TraesCS1A02G074000	turquoise
TraesCS1A02G074100	green
TraesCS1A02G074200	greenyellow
TraesCS1A02G074300	blue
TraesCS1A02G074400	magenta
TraesCS1A02G074800	blue
TraesCS1A02G074900	turquoise
TraesCS1A02G075000	brown
TraesCS1A02G075100	turquoise
TraesCS1A02G075200	salmon4
TraesCS1A02G075300	sienna3
TraesCS1A02G075400	sienna3
TraesCS1A02G075500	plum1
TraesCS1A02G075600	turquoise
TraesCS1A02G075700	turquoise
TraesCS1A02G075800	turquoise
TraesCS1A02G075900	blue
TraesCS1A02G076000	turquoise
TraesCS1A02G076100	turquoise
TraesCS1A02G076200	salmon
TraesCS1A02G076300	blue
TraesCS1A02G076400	turquoise
TraesCS1A02G076500	salmon
TraesCS1A02G076700	lightyellow
TraesCS1A02G076800	turquoise
TraesCS1A02G076900	turquoise
TraesCS1A02G077000	blue
TraesCS1A02G077100	lightyellow
TraesCS1A02G077200	tan
TraesCS1A02G077300	lightyellow
TraesCS1A02G077400	yellow4
TraesCS1A02G077500	pink
TraesCS1A02G077600	purple
TraesCS1A02G077700	brown
TraesCS1A02G077800	midnightblue
TraesCS1A02G077900	darkorange2
TraesCS1A02G078100	green
TraesCS1A02G078200	darkgreen
TraesCS1A02G078300	turquoise
TraesCS1A02G078400	brown
TraesCS1A02G078600	brown
TraesCS1A02G078700	turquoise
TraesCS1A02G078800	blue
TraesCS1A02G078900	purple
TraesCS1A02G079000	greenyellow
TraesCS1A02G079300	orange
TraesCS1A02G079400	green
TraesCS1A02G079500	salmon
TraesCS1A02G079600	blue
TraesCS1A02G079700	grey60
TraesCS1A02G079800	magenta
TraesCS1A02G079900	turquoise
TraesCS1A02G080000	magenta
TraesCS1A02G080100	turquoise
TraesCS1A02G080200	turquoise
TraesCS1A02G080300	turquoise
TraesCS1A02G080500	turquoise
TraesCS1A02G080600	turquoise
TraesCS1A02G080700	turquoise
TraesCS1A02G081100	blue
TraesCS1A02G081200	turquoise
TraesCS1A02G081300	grey
TraesCS1A02G081400	plum2
TraesCS1A02G081500	tan
TraesCS1A02G081700	greenyellow
TraesCS1A02G081900	purple
TraesCS1A02G082000	yellow
TraesCS1A02G082100	purple
TraesCS1A02G082200	grey60
TraesCS1A02G082300	midnightblue
TraesCS1A02G082500	grey60
TraesCS1A02G082600	grey
TraesCS1A02G082700	grey
TraesCS1A02G082800	darkolivegreen
TraesCS1A02G082900	purple
TraesCS1A02G083000	turquoise
TraesCS1A02G083100	green
TraesCS1A02G083300	purple
TraesCS1A02G083400	turquoise
TraesCS1A02G083500	turquoise
TraesCS1A02G083700	darkred
TraesCS1A02G083900	turquoise
TraesCS1A02G084000	red
TraesCS1A02G084100	turquoise
TraesCS1A02G084200	turquoise
TraesCS1A02G084300	turquoise
TraesCS1A02G084400	turquoise
TraesCS1A02G084500	blue
TraesCS1A02G084600	tan
TraesCS1A02G084800	red
TraesCS1A02G084900	turquoise
TraesCS1A02G085000	purple
TraesCS1A02G085200	blue
TraesCS1A02G085400	darkmagenta
TraesCS1A02G085500	turquoise
TraesCS1A02G085600	blue
TraesCS1A02G085700	turquoise
TraesCS1A02G085800	blue
TraesCS1A02G085900	turquoise
TraesCS1A02G086100	blue
TraesCS1A02G086200	turquoise
TraesCS1A02G086400	orange
TraesCS1A02G086500	pink
TraesCS1A02G086600	yellow
TraesCS1A02G086700	brown
TraesCS1A02G086800	turquoise
TraesCS1A02G086900	yellow
TraesCS1A02G087000	black
TraesCS1A02G087100	turquoise
TraesCS1A02G087200	cyan
TraesCS1A02G087300	tan
TraesCS1A02G087400	turquoise
TraesCS1A02G087500	yellow
TraesCS1A02G087600	purple
TraesCS1A02G087700	turquoise
TraesCS1A02G087900	turquoise
TraesCS1A02G088000	turquoise
TraesCS1A02G088100	turquoise
TraesCS1A02G088200	turquoise
TraesCS1A02G088300	red
TraesCS1A02G088400	red
TraesCS1A02G088600	brown
TraesCS1A02G088800	purple
TraesCS1A02G088900	tan
TraesCS1A02G089000	turquoise
TraesCS1A02G089100	yellow
TraesCS1A02G089200	red
TraesCS1A02G089300	sienna3
TraesCS1A02G089400	yellow
TraesCS1A02G089500	grey60
TraesCS1A02G089600	grey60
TraesCS1A02G089700	lightgreen
TraesCS1A02G089800	grey
TraesCS1A02G089900	yellow
TraesCS1A02G090000	pink
TraesCS1A02G090100	grey
TraesCS1A02G090200	saddlebrown
TraesCS1A02G090300	turquoise
TraesCS1A02G090400	blue
TraesCS1A02G090500	turquoise
TraesCS1A02G090600	turquoise
TraesCS1A02G090700	blue
TraesCS1A02G091000	lightyellow
TraesCS1A02G091100	turquoise
TraesCS1A02G091200	turquoise
TraesCS1A02G091300	turquoise
TraesCS1A02G091400	turquoise
TraesCS1A02G091500	greenyellow
TraesCS1A02G091600	grey60
TraesCS1A02G091700	turquoise
TraesCS1A02G091900	darkmagenta
TraesCS1A02G092000	black
TraesCS1A02G092100	red
TraesCS1A02G092300	green
TraesCS1A02G092500	black
TraesCS1A02G092700	turquoise
TraesCS1A02G092800	turquoise
TraesCS1A02G092900	turquoise
TraesCS1A02G093000	midnightblue
TraesCS1A02G093100	cyan
TraesCS1A02G093200	grey60
TraesCS1A02G093300	grey60
TraesCS1A02G093400	yellow
TraesCS1A02G093500	darkgreen
TraesCS1A02G093700	magenta
TraesCS1A02G093800	blue
TraesCS1A02G093900	turquoise
TraesCS1A02G094000	turquoise
TraesCS1A02G094100	blue
TraesCS1A02G094200	turquoise
TraesCS1A02G094500	greenyellow
TraesCS1A02G094700	brown
TraesCS1A02G094800	turquoise
TraesCS1A02G094900	white
TraesCS1A02G095000	yellow
TraesCS1A02G095100	turquoise
TraesCS1A02G095200	turquoise
TraesCS1A02G095300	paleturquoise
TraesCS1A02G095400	turquoise
TraesCS1A02G095500	grey60
TraesCS1A02G095600	turquoise
TraesCS1A02G095700	turquoise
TraesCS1A02G095800	brown
TraesCS1A02G096000	turquoise
TraesCS1A02G096100	turquoise
TraesCS1A02G096200	purple
TraesCS1A02G096400	green
TraesCS1A02G096500	turquoise
TraesCS1A02G096600	darkgrey
TraesCS1A02G097000	turquoise
TraesCS1A02G097100	brown
TraesCS1A02G097200	thistle2
TraesCS1A02G097300	royalblue
TraesCS1A02G097400	turquoise
TraesCS1A02G097500	yellow
TraesCS1A02G097600	turquoise
TraesCS1A02G097700	yellow
TraesCS1A02G097800	orange
TraesCS1A02G097900	midnightblue
TraesCS1A02G098100	darkgreen
TraesCS1A02G098200	skyblue
TraesCS1A02G098300	midnightblue
TraesCS1A02G098500	green
TraesCS1A02G098800	darkorange
TraesCS1A02G098900	red
TraesCS1A02G099000	turquoise
TraesCS1A02G099200	darkorange
TraesCS1A02G099300	darkgreen
TraesCS1A02G099400	yellow
TraesCS1A02G099500	blue
TraesCS1A02G099600	turquoise
TraesCS1A02G099700	turquoise
TraesCS1A02G099800	sienna3
TraesCS1A02G099900	darkorange
TraesCS1A02G100000	blue
TraesCS1A02G100100	red
TraesCS1A02G100200	blue
TraesCS1A02G100300	turquoise
TraesCS1A02G100400	turquoise
TraesCS1A02G100500	turquoise
TraesCS1A02G100600	turquoise
TraesCS1A02G100700	brown
TraesCS1A02G100800	blue
TraesCS1A02G101000	grey
TraesCS1A02G101100	blue
TraesCS1A02G101200	midnightblue
TraesCS1A02G101300	turquoise
TraesCS1A02G101500	plum1
TraesCS1A02G101600	turquoise
TraesCS1A02G101700	turquoise
TraesCS1A02G101800	magenta
TraesCS1A02G101900	turquoise
TraesCS1A02G102100	cyan
TraesCS1A02G102200	greenyellow
TraesCS1A02G102300	turquoise
TraesCS1A02G102400	purple
TraesCS1A02G102500	turquoise
TraesCS1A02G102600	turquoise
TraesCS1A02G102700	brown
TraesCS1A02G102800	turquoise
TraesCS1A02G102900	turquoise
TraesCS1A02G103000	turquoise
TraesCS1A02G103013	cyan
TraesCS1A02G103014	skyblue3
TraesCS1A02G103019	blue
TraesCS1A02G103100	brown
TraesCS1A02G103300	royalblue
TraesCS1A02G103500	paleturquoise
TraesCS1A02G103600	lightyellow
TraesCS1A02G103800	red
TraesCS1A02G103900	black
TraesCS1A02G104000	turquoise
TraesCS1A02G104100	skyblue
TraesCS1A02G104200	pink
TraesCS1A02G104500	turquoise
TraesCS1A02G104600	turquoise
TraesCS1A02G104700	turquoise
TraesCS1A02G105200	white
TraesCS1A02G105300	turquoise
TraesCS1A02G105400	turquoise
TraesCS1A02G105500	grey
TraesCS1A02G105600	brown
TraesCS1A02G105700	magenta
TraesCS1A02G105800	turquoise
TraesCS1A02G105900	grey60
TraesCS1A02G106000	blue
TraesCS1A02G106100	turquoise
TraesCS1A02G106200	lightyellow
TraesCS1A02G106300	turquoise
TraesCS1A02G106500	turquoise
TraesCS1A02G106600	yellow
TraesCS1A02G106700	turquoise
TraesCS1A02G106800	darkolivegreen
TraesCS1A02G107000	black
TraesCS1A02G107200	lightyellow
TraesCS1A02G107300	yellow
TraesCS1A02G107500	royalblue
TraesCS1A02G107600	grey
TraesCS1A02G107700	black
TraesCS1A02G107800	turquoise
TraesCS1A02G107900	turquoise
TraesCS1A02G108000	turquoise
TraesCS1A02G108100	darkturquoise
TraesCS1A02G108200	lightyellow
TraesCS1A02G108300	ivory
TraesCS1A02G108400	skyblue
TraesCS1A02G108500	black
TraesCS1A02G108600	grey
TraesCS1A02G108800	turquoise
TraesCS1A02G108900	yellow
TraesCS1A02G109000	turquoise
TraesCS1A02G109100	magenta
TraesCS1A02G109200	turquoise
TraesCS1A02G109300	turquoise
TraesCS1A02G109400	turquoise
TraesCS1A02G109500	turquoise
TraesCS1A02G109600	pink
TraesCS1A02G109700	blue
TraesCS1A02G109800	tan
TraesCS1A02G110000	black
TraesCS1A02G110100	turquoise
TraesCS1A02G110200	lightgreen
TraesCS1A02G110300	yellow
TraesCS1A02G110400	red
TraesCS1A02G110500	blue
TraesCS1A02G110700	turquoise
TraesCS1A02G110800	turquoise
TraesCS1A02G110900	orangered4
TraesCS1A02G111000	brown
TraesCS1A02G111100	turquoise
TraesCS1A02G111300	blue
TraesCS1A02G111400	blue
TraesCS1A02G111500	tan
TraesCS1A02G111600	brown
TraesCS1A02G111800	orange
TraesCS1A02G111900	pink
TraesCS1A02G112000	yellow
TraesCS1A02G112100	turquoise
TraesCS1A02G112200	turquoise
TraesCS1A02G112300	blue
TraesCS1A02G112400	grey
TraesCS1A02G112500	yellow
TraesCS1A02G112600	turquoise
TraesCS1A02G112700	yellow
TraesCS1A02G112800	turquoise
TraesCS1A02G112900	lightgreen
TraesCS1A02G113000	royalblue
TraesCS1A02G113100	green
TraesCS1A02G113200	greenyellow
TraesCS1A02G113300	darkgreen
TraesCS1A02G113500	green
TraesCS1A02G113600	magenta
TraesCS1A02G113700	yellow
TraesCS1A02G113800	brown
TraesCS1A02G113900	green
TraesCS1A02G114000	turquoise
TraesCS1A02G114100	turquoise
TraesCS1A02G114300	yellow
TraesCS1A02G114400	blue
TraesCS1A02G114500	tan
TraesCS1A02G114600	grey
TraesCS1A02G114700	violet
TraesCS1A02G114800	turquoise
TraesCS1A02G115000	turquoise
TraesCS1A02G115100	purple
TraesCS1A02G115200	turquoise
TraesCS1A02G115300	turquoise
TraesCS1A02G115400	turquoise
TraesCS1A02G115500	grey
TraesCS1A02G115600	purple
TraesCS1A02G115700	blue
TraesCS1A02G115900	grey60
TraesCS1A02G116000	turquoise
TraesCS1A02G116200	violet
TraesCS1A02G116300	grey
TraesCS1A02G116500	turquoise
TraesCS1A02G116600	turquoise
TraesCS1A02G116700	black
TraesCS1A02G116800	turquoise
TraesCS1A02G116900	black
TraesCS1A02G117000	pink
TraesCS1A02G117100	darkmagenta
TraesCS1A02G117300	brown
TraesCS1A02G117400	blue
TraesCS1A02G117500	turquoise
TraesCS1A02G117600	turquoise
TraesCS1A02G117700	darkred
TraesCS1A02G117900	black
TraesCS1A02G118100	darkturquoise
TraesCS1A02G118200	magenta
TraesCS1A02G118300	turquoise
TraesCS1A02G118400	yellow
TraesCS1A02G118500	black
TraesCS1A02G118700	turquoise
TraesCS1A02G118800	magenta
TraesCS1A02G118900	green
TraesCS1A02G119000	turquoise
TraesCS1A02G119100	brown
TraesCS1A02G119200	skyblue
TraesCS1A02G119300	yellow
TraesCS1A02G119500	pink
TraesCS1A02G119600	darkgrey
TraesCS1A02G119700	turquoise
TraesCS1A02G119800	black
TraesCS1A02G119900	tan
TraesCS1A02G120000	turquoise
TraesCS1A02G120100	blue
TraesCS1A02G120200	yellow
TraesCS1A02G120300	blue
TraesCS1A02G120400	yellow
TraesCS1A02G120500	turquoise
TraesCS1A02G120600	turquoise
TraesCS1A02G120700	greenyellow
TraesCS1A02G120800	turquoise
TraesCS1A02G120900	blue
TraesCS1A02G121000	turquoise
TraesCS1A02G121100	blue
TraesCS1A02G121200	turquoise
TraesCS1A02G121300	yellow
TraesCS1A02G121400	yellow
TraesCS1A02G121500	brown4
TraesCS1A02G121700	brown
TraesCS1A02G121800	black
TraesCS1A02G122000	pink
TraesCS1A02G122100	turquoise
TraesCS1A02G122200	mediumpurple3
TraesCS1A02G122300	turquoise
TraesCS1A02G122400	turquoise
TraesCS1A02G122500	black
TraesCS1A02G122600	blue
TraesCS1A02G122700	yellow
TraesCS1A02G122800	pink
TraesCS1A02G122900	green
TraesCS1A02G123000	turquoise
TraesCS1A02G123100	turquoise
TraesCS1A02G123300	turquoise
TraesCS1A02G123400	orange
TraesCS1A02G123600	magenta
TraesCS1A02G123800	darkorange
TraesCS1A02G123900	blue
TraesCS1A02G124000	turquoise
TraesCS1A02G124100	grey
TraesCS1A02G124200	turquoise
TraesCS1A02G124300	midnightblue
TraesCS1A02G124400	turquoise
TraesCS1A02G124500	royalblue
TraesCS1A02G124600	turquoise
TraesCS1A02G124700	skyblue
TraesCS1A02G124800	lightcyan1
TraesCS1A02G124900	blue
TraesCS1A02G125000	yellow
TraesCS1A02G125100	turquoise
TraesCS1A02G125200	cyan
TraesCS1A02G125300	grey
TraesCS1A02G125400	yellow
TraesCS1A02G125500	turquoise
TraesCS1A02G125600	turquoise
TraesCS1A02G125700	blue
TraesCS1A02G125800	orange
TraesCS1A02G125900	turquoise
TraesCS1A02G126000	turquoise
TraesCS1A02G126100	grey
TraesCS1A02G126200	paleturquoise
TraesCS1A02G126300	turquoise
TraesCS1A02G126400	brown
TraesCS1A02G126500	blue
TraesCS1A02G126600	brown
TraesCS1A02G126700	saddlebrown
TraesCS1A02G126800	yellow
TraesCS1A02G126900	turquoise
TraesCS1A02G127000	turquoise
TraesCS1A02G127100	turquoise
TraesCS1A02G127200	brown
TraesCS1A02G127300	orange
TraesCS1A02G127400	turquoise
TraesCS1A02G127500	turquoise
TraesCS1A02G127600	steelblue
TraesCS1A02G127700	blue
TraesCS1A02G127800	lightcyan
TraesCS1A02G127900	black
TraesCS1A02G128000	cyan
TraesCS1A02G128100	turquoise
TraesCS1A02G128200	turquoise
TraesCS1A02G128300	blue
TraesCS1A02G128500	mediumpurple3
TraesCS1A02G128600	yellow
TraesCS1A02G128700	turquoise
TraesCS1A02G128900	grey
TraesCS1A02G129100	turquoise
TraesCS1A02G129200	green
TraesCS1A02G129300	midnightblue
TraesCS1A02G129400	turquoise
TraesCS1A02G129500	plum1
TraesCS1A02G129600	magenta
TraesCS1A02G129700	brown
TraesCS1A02G129800	turquoise
TraesCS1A02G129900	cyan
TraesCS1A02G130000	blue
TraesCS1A02G130100	red
TraesCS1A02G130200	lightcyan
TraesCS1A02G130400	darkolivegreen
TraesCS1A02G130600	turquoise
TraesCS1A02G130700	turquoise
TraesCS1A02G130800	brown
TraesCS1A02G130900	turquoise
TraesCS1A02G131000	yellow
TraesCS1A02G131100	turquoise
TraesCS1A02G131200	mediumpurple3
TraesCS1A02G131300	violet
TraesCS1A02G131400	royalblue
TraesCS1A02G131500	yellow
TraesCS1A02G131600	turquoise
TraesCS1A02G131800	green
TraesCS1A02G131900	purple
TraesCS1A02G132000	blue
TraesCS1A02G132300	orangered4
TraesCS1A02G132400	lightcyan
TraesCS1A02G132500	sienna3
TraesCS1A02G132600	yellow
TraesCS1A02G132900	darkgreen
TraesCS1A02G133000	bisque4
TraesCS1A02G133100	turquoise
TraesCS1A02G133300	blue
TraesCS1A02G133400	turquoise
TraesCS1A02G133500	turquoise
TraesCS1A02G133600	blue
TraesCS1A02G133700	turquoise
TraesCS1A02G133800	lightgreen
TraesCS1A02G133900	turquoise
TraesCS1A02G134000	black
TraesCS1A02G134100	grey
TraesCS1A02G134200	grey
TraesCS1A02G134300	grey
TraesCS1A02G134400	purple
TraesCS1A02G134500	turquoise
TraesCS1A02G134600	turquoise
TraesCS1A02G134700	lightyellow
TraesCS1A02G134800	blue
TraesCS1A02G135000	maroon
TraesCS1A02G135100	magenta
TraesCS1A02G135300	turquoise
TraesCS1A02G135600	blue
TraesCS1A02G135700	turquoise
TraesCS1A02G135800	turquoise
TraesCS1A02G135900	white
TraesCS1A02G136000	turquoise
TraesCS1A02G136100	turquoise
TraesCS1A02G136200	turquoise
TraesCS1A02G136400	turquoise
TraesCS1A02G136500	turquoise
TraesCS1A02G136600	turquoise
TraesCS1A02G136700	turquoise
TraesCS1A02G136800	turquoise
TraesCS1A02G136900	turquoise
TraesCS1A02G137000	turquoise
TraesCS1A02G137100	blue
TraesCS1A02G137200	turquoise
TraesCS1A02G137300	blue
TraesCS1A02G137400	blue
TraesCS1A02G137500	yellow
TraesCS1A02G137600	turquoise
TraesCS1A02G137700	saddlebrown
TraesCS1A02G137800	yellow
TraesCS1A02G137900	turquoise
TraesCS1A02G138000	turquoise
TraesCS1A02G138100	turquoise
TraesCS1A02G138200	purple
TraesCS1A02G138300	tan
TraesCS1A02G138400	turquoise
TraesCS1A02G138500	turquoise
TraesCS1A02G138600	turquoise
TraesCS1A02G138800	pink
TraesCS1A02G138900	turquoise
TraesCS1A02G139100	yellow
TraesCS1A02G139200	lightcyan
TraesCS1A02G139300	yellow
TraesCS1A02G139400	yellow
TraesCS1A02G139500	turquoise
TraesCS1A02G139600	turquoise
TraesCS1A02G139700	grey
TraesCS1A02G139800	lightsteelblue1
TraesCS1A02G139900	turquoise
TraesCS1A02G140100	midnightblue
TraesCS1A02G140300	green
TraesCS1A02G140400	darkmagenta
TraesCS1A02G140500	black
TraesCS1A02G140600	turquoise
TraesCS1A02G140700	midnightblue
TraesCS1A02G140800	sienna3
TraesCS1A02G140900	turquoise
TraesCS1A02G141000	greenyellow
TraesCS1A02G141100	turquoise
TraesCS1A02G141200	turquoise
TraesCS1A02G141300	blue
TraesCS1A02G141400	mediumpurple3
TraesCS1A02G141500	brown
TraesCS1A02G141600	blue
TraesCS1A02G141700	pink
TraesCS1A02G141900	lightgreen
TraesCS1A02G142000	turquoise
TraesCS1A02G142100	lightyellow
TraesCS1A02G142200	turquoise
TraesCS1A02G142300	yellow
TraesCS1A02G142400	turquoise
TraesCS1A02G142500	turquoise
TraesCS1A02G142600	blue
TraesCS1A02G142700	turquoise
TraesCS1A02G142800	turquoise
TraesCS1A02G142900	darkgrey
TraesCS1A02G143000	grey
TraesCS1A02G143100	grey
TraesCS1A02G143200	turquoise
TraesCS1A02G143300	pink
TraesCS1A02G143400	turquoise
TraesCS1A02G143500	turquoise
TraesCS1A02G143600	royalblue
TraesCS1A02G143700	turquoise
TraesCS1A02G143800	turquoise
TraesCS1A02G143900	lightgreen
TraesCS1A02G144000	turquoise
TraesCS1A02G144200	cyan
TraesCS1A02G144400	red
TraesCS1A02G144500	royalblue
TraesCS1A02G144600	green
TraesCS1A02G144700	turquoise
TraesCS1A02G144800	turquoise
TraesCS1A02G145000	turquoise
TraesCS1A02G145100	brown
TraesCS1A02G145500	turquoise
TraesCS1A02G145600	blue
TraesCS1A02G145700	lightcyan
TraesCS1A02G145800	turquoise
TraesCS1A02G145900	yellow
TraesCS1A02G146000	salmon
TraesCS1A02G146200	turquoise
TraesCS1A02G146400	turquoise
TraesCS1A02G146500	greenyellow
TraesCS1A02G146600	turquoise
TraesCS1A02G146700	lightcyan
TraesCS1A02G146800	paleturquoise
TraesCS1A02G146900	grey
TraesCS1A02G147000	turquoise
TraesCS1A02G147100	purple
TraesCS1A02G147300	cyan
TraesCS1A02G147400	blue
TraesCS1A02G147500	yellow
TraesCS1A02G147600	purple
TraesCS1A02G147700	turquoise
TraesCS1A02G148000	turquoise
TraesCS1A02G148300	turquoise
TraesCS1A02G148400	turquoise
TraesCS1A02G148600	lightgreen
TraesCS1A02G149000	lightyellow
TraesCS1A02G149100	turquoise
TraesCS1A02G149200	turquoise
TraesCS1A02G149300	turquoise
TraesCS1A02G149400	salmon
TraesCS1A02G149500	turquoise
TraesCS1A02G149600	greenyellow
TraesCS1A02G149700	darkorange
TraesCS1A02G149800	blue
TraesCS1A02G150000	magenta
TraesCS1A02G150100	floralwhite
TraesCS1A02G150200	brown
TraesCS1A02G150300	grey
TraesCS1A02G150400	blue
TraesCS1A02G150500	blue
TraesCS1A02G150600	purple
TraesCS1A02G150700	white
TraesCS1A02G150800	coral2
TraesCS1A02G150900	tan
TraesCS1A02G151000	turquoise
TraesCS1A02G151100	turquoise
TraesCS1A02G151200	blue
TraesCS1A02G151400	magenta
TraesCS1A02G151500	turquoise
TraesCS1A02G151600	sienna3
TraesCS1A02G151700	skyblue3
TraesCS1A02G151900	brown
TraesCS1A02G152000	mediumpurple3
TraesCS1A02G152100	turquoise
TraesCS1A02G152200	turquoise
TraesCS1A02G152300	black
TraesCS1A02G152400	paleturquoise
TraesCS1A02G152500	turquoise
TraesCS1A02G152600	red
TraesCS1A02G152800	purple
TraesCS1A02G152900	darkred
TraesCS1A02G153000	pink
TraesCS1A02G153100	turquoise
TraesCS1A02G153200	orange
TraesCS1A02G153300	yellow
TraesCS1A02G153400	blue
TraesCS1A02G153500	turquoise
TraesCS1A02G153600	grey60
TraesCS1A02G153700	turquoise
TraesCS1A02G153800	green
TraesCS1A02G153900	turquoise
TraesCS1A02G154000	tan
TraesCS1A02G154100	turquoise
TraesCS1A02G154200	lightyellow
TraesCS1A02G154300	yellowgreen
TraesCS1A02G154400	green
TraesCS1A02G154500	turquoise
TraesCS1A02G154600	turquoise
TraesCS1A02G154700	turquoise
TraesCS1A02G155000	turquoise
TraesCS1A02G155200	turquoise
TraesCS1A02G155500	turquoise
TraesCS1A02G155600	violet
TraesCS1A02G155700	turquoise
TraesCS1A02G155800	darkmagenta
TraesCS1A02G155900	turquoise
TraesCS1A02G156000	turquoise
TraesCS1A02G156100	darkgrey
TraesCS1A02G156200	turquoise
TraesCS1A02G156300	yellow
TraesCS1A02G156400	brown
TraesCS1A02G156500	brown
TraesCS1A02G156600	turquoise
TraesCS1A02G156800	turquoise
TraesCS1A02G156900	lightyellow
TraesCS1A02G157000	skyblue
TraesCS1A02G157100	grey
TraesCS1A02G157200	grey
TraesCS1A02G157500	turquoise
TraesCS1A02G157600	magenta
TraesCS1A02G157700	honeydew1
TraesCS1A02G157800	turquoise
TraesCS1A02G157900	black
TraesCS1A02G158300	brown
TraesCS1A02G158400	pink
TraesCS1A02G158500	turquoise
TraesCS1A02G158600	pink
TraesCS1A02G158700	yellow
TraesCS1A02G158800	turquoise
TraesCS1A02G158900	turquoise
TraesCS1A02G159100	turquoise
TraesCS1A02G159200	grey60
TraesCS1A02G159300	turquoise
TraesCS1A02G159400	violet
TraesCS1A02G159500	skyblue2
TraesCS1A02G159600	thistle1
TraesCS1A02G159700	blue
TraesCS1A02G159800	darkturquoise
TraesCS1A02G160000	blue
TraesCS1A02G160100	turquoise
TraesCS1A02G160200	turquoise
TraesCS1A02G160300	blue
TraesCS1A02G160400	turquoise
TraesCS1A02G160500	turquoise
TraesCS1A02G160600	turquoise
TraesCS1A02G160700	purple
TraesCS1A02G160800	yellow
TraesCS1A02G160900	greenyellow
TraesCS1A02G161000	salmon
TraesCS1A02G161200	grey
TraesCS1A02G161300	sienna3
TraesCS1A02G161400	cyan
TraesCS1A02G161800	plum
TraesCS1A02G161900	turquoise
TraesCS1A02G162000	darkmagenta
TraesCS1A02G162100	black
TraesCS1A02G162200	turquoise
TraesCS1A02G162300	yellow
TraesCS1A02G162400	yellow
TraesCS1A02G162500	brown
TraesCS1A02G162600	turquoise
TraesCS1A02G162800	turquoise
TraesCS1A02G163000	yellow
TraesCS1A02G163100	turquoise
TraesCS1A02G163200	turquoise
TraesCS1A02G163400	turquoise
TraesCS1A02G163500	purple
TraesCS1A02G163600	green
TraesCS1A02G163700	darkred
TraesCS1A02G163800	midnightblue
TraesCS1A02G163900	turquoise
TraesCS1A02G164000	black
TraesCS1A02G164200	turquoise
TraesCS1A02G164300	turquoise
TraesCS1A02G164400	turquoise
TraesCS1A02G164500	lightyellow
TraesCS1A02G164600	grey60
TraesCS1A02G164700	turquoise
TraesCS1A02G164800	turquoise
TraesCS1A02G164900	brown
TraesCS1A02G165200	cyan
TraesCS1A02G165300	grey
TraesCS1A02G165400	brown4
TraesCS1A02G165500	grey
TraesCS1A02G165600	grey
TraesCS1A02G165700	pink
TraesCS1A02G165800	turquoise
TraesCS1A02G165900	grey
TraesCS1A02G166000	skyblue3
TraesCS1A02G166100	darkgreen
TraesCS1A02G166200	yellow
TraesCS1A02G166400	cyan
TraesCS1A02G166500	midnightblue
TraesCS1A02G166600	brown
TraesCS1A02G166800	green
TraesCS1A02G166900	yellow
TraesCS1A02G167000	turquoise
TraesCS1A02G167100	skyblue1
TraesCS1A02G167200	sienna3
TraesCS1A02G167300	turquoise
TraesCS1A02G167400	turquoise
TraesCS1A02G167600	turquoise
TraesCS1A02G167800	darkturquoise
TraesCS1A02G168100	darkorange
TraesCS1A02G168200	darkmagenta
TraesCS1A02G168400	turquoise
TraesCS1A02G168500	brown
TraesCS1A02G168600	brown
TraesCS1A02G168700	turquoise
TraesCS1A02G168800	turquoise
TraesCS1A02G168900	yellow
TraesCS1A02G169000	grey
TraesCS1A02G169100	turquoise
TraesCS1A02G169200	turquoise
TraesCS1A02G169300	lightsteelblue1
TraesCS1A02G169400	turquoise
TraesCS1A02G169500	turquoise
TraesCS1A02G169600	blue
TraesCS1A02G169700	orange
TraesCS1A02G169800	lightyellow
TraesCS1A02G169900	turquoise
TraesCS1A02G170000	honeydew1
TraesCS1A02G170100	lightcyan
TraesCS1A02G170200	turquoise
TraesCS1A02G170300	sienna3
TraesCS1A02G170400	turquoise
TraesCS1A02G170500	yellow
TraesCS1A02G170600	turquoise
TraesCS1A02G170700	turquoise
TraesCS1A02G170800	blue
TraesCS1A02G170900	skyblue3
TraesCS1A02G171000	turquoise
TraesCS1A02G171100	grey
TraesCS1A02G171200	blue
TraesCS1A02G171300	turquoise
TraesCS1A02G171400	blue
TraesCS1A02G171500	yellow
TraesCS1A02G171600	purple
TraesCS1A02G171700	turquoise
TraesCS1A02G171900	darkred
TraesCS1A02G172100	turquoise
TraesCS1A02G172200	mediumorchid
TraesCS1A02G172300	turquoise
TraesCS1A02G172600	greenyellow
TraesCS1A02G172700	turquoise
TraesCS1A02G172800	blue
TraesCS1A02G172900	red
TraesCS1A02G173000	brown
TraesCS1A02G173100	skyblue2
TraesCS1A02G173200	yellow
TraesCS1A02G173300	greenyellow
TraesCS1A02G173400	skyblue3
TraesCS1A02G173500	lightgreen
TraesCS1A02G173600	turquoise
TraesCS1A02G173700	turquoise
TraesCS1A02G173800	darkorange
TraesCS1A02G173900	grey
TraesCS1A02G174000	lightgreen
TraesCS1A02G174100	plum1
TraesCS1A02G174200	blue
TraesCS1A02G174400	bisque4
TraesCS1A02G174500	turquoise
TraesCS1A02G174600	grey
TraesCS1A02G174700	pink
TraesCS1A02G174800	lightyellow
TraesCS1A02G174900	cyan
TraesCS1A02G175000	turquoise
TraesCS1A02G175200	turquoise
TraesCS1A02G175300	blue
TraesCS1A02G175500	pink
TraesCS1A02G175600	turquoise
TraesCS1A02G175700	turquoise
TraesCS1A02G175800	blue
TraesCS1A02G175900	turquoise
TraesCS1A02G176000	turquoise
TraesCS1A02G176100	turquoise
TraesCS1A02G176200	blue
TraesCS1A02G176300	lightgreen
TraesCS1A02G176400	salmon
TraesCS1A02G176500	grey
TraesCS1A02G176700	turquoise
TraesCS1A02G176800	lightcyan
TraesCS1A02G176900	pink
TraesCS1A02G177000	turquoise
TraesCS1A02G177100	green
TraesCS1A02G177200	brown
TraesCS1A02G177300	honeydew1
TraesCS1A02G177400	turquoise
TraesCS1A02G177500	grey
TraesCS1A02G177600	turquoise
TraesCS1A02G177700	yellow
TraesCS1A02G177800	darkgreen
TraesCS1A02G178100	brown
TraesCS1A02G178200	yellow
TraesCS1A02G178300	turquoise
TraesCS1A02G178400	lightyellow
TraesCS1A02G178500	blue
TraesCS1A02G178600	blue
TraesCS1A02G178700	turquoise
TraesCS1A02G178900	plum
TraesCS1A02G179000	turquoise
TraesCS1A02G179100	tan
TraesCS1A02G179300	greenyellow
TraesCS1A02G179400	orange
TraesCS1A02G179500	pink
TraesCS1A02G179600	darkorange
TraesCS1A02G179700	turquoise
TraesCS1A02G179800	magenta
TraesCS1A02G179900	greenyellow
TraesCS1A02G180000	lightyellow
TraesCS1A02G180100	turquoise
TraesCS1A02G180200	turquoise
TraesCS1A02G180300	turquoise
TraesCS1A02G180400	turquoise
TraesCS1A02G180500	turquoise
TraesCS1A02G180700	grey
TraesCS1A02G180800	turquoise
TraesCS1A02G180900	green
TraesCS1A02G181000	red
TraesCS1A02G181100	turquoise
TraesCS1A02G181300	white
TraesCS1A02G181400	yellow
TraesCS1A02G181500	turquoise
TraesCS1A02G181600	yellow
TraesCS1A02G181700	midnightblue
TraesCS1A02G181800	white
TraesCS1A02G181900	lightsteelblue1
TraesCS1A02G182000	turquoise
TraesCS1A02G182100	lightpink4
TraesCS1A02G182200	greenyellow
TraesCS1A02G182300	purple
TraesCS1A02G182400	turquoise
TraesCS1A02G182500	turquoise
TraesCS1A02G182600	floralwhite
TraesCS1A02G182700	yellow
TraesCS1A02G182800	turquoise
TraesCS1A02G182900	turquoise
TraesCS1A02G183000	turquoise
TraesCS1A02G183100	darkred
TraesCS1A02G183200	turquoise
TraesCS1A02G183400	turquoise
TraesCS1A02G183600	green
TraesCS1A02G183700	grey
TraesCS1A02G183800	turquoise
TraesCS1A02G183900	lightgreen
TraesCS1A02G184000	turquoise
TraesCS1A02G184100	turquoise
TraesCS1A02G184300	purple
TraesCS1A02G184400	lightgreen
TraesCS1A02G184500	darkorange
TraesCS1A02G184600	yellow
TraesCS1A02G184700	greenyellow
TraesCS1A02G184800	turquoise
TraesCS1A02G184900	blue
TraesCS1A02G185100	green
TraesCS1A02G185200	turquoise
TraesCS1A02G185300	yellow
TraesCS1A02G185400	green
TraesCS1A02G185500	blue
TraesCS1A02G185700	green
TraesCS1A02G185800	cyan
TraesCS1A02G185900	yellow
TraesCS1A02G186000	black
TraesCS1A02G186100	grey60
TraesCS1A02G186200	green
TraesCS1A02G186300	brown
TraesCS1A02G186400	blue
TraesCS1A02G186500	blue
TraesCS1A02G186600	blue
TraesCS1A02G186700	blue
TraesCS1A02G186800	lightgreen
TraesCS1A02G186900	darkmagenta
TraesCS1A02G187000	blue
TraesCS1A02G187100	cyan
TraesCS1A02G187300	turquoise
TraesCS1A02G187400	grey60
TraesCS1A02G187500	cyan
TraesCS1A02G187600	midnightblue
TraesCS1A02G187700	turquoise
TraesCS1A02G187800	lightyellow
TraesCS1A02G187900	cyan
TraesCS1A02G188000	darkgrey
TraesCS1A02G188200	yellow
TraesCS1A02G188400	red
TraesCS1A02G188500	magenta
TraesCS1A02G188600	grey
TraesCS1A02G188700	grey60
TraesCS1A02G188800	turquoise
TraesCS1A02G188900	black
TraesCS1A02G189000	turquoise
TraesCS1A02G189100	greenyellow
TraesCS1A02G189200	midnightblue
TraesCS1A02G189300	turquoise
TraesCS1A02G189400	lightcyan
TraesCS1A02G189500	turquoise
TraesCS1A02G189600	turquoise
TraesCS1A02G189700	greenyellow
TraesCS1A02G189800	turquoise
TraesCS1A02G189900	white
TraesCS1A02G190000	blue
TraesCS1A02G190100	greenyellow
TraesCS1A02G190200	yellow
TraesCS1A02G190300	cyan
TraesCS1A02G190400	brown
TraesCS1A02G190500	blue
TraesCS1A02G190600	red
TraesCS1A02G190700	turquoise
TraesCS1A02G190800	yellow
TraesCS1A02G190900	turquoise
TraesCS1A02G191000	skyblue
TraesCS1A02G191100	cyan
TraesCS1A02G191300	turquoise
TraesCS1A02G191400	grey
TraesCS1A02G191500	greenyellow
TraesCS1A02G191600	blue
TraesCS1A02G191700	turquoise
TraesCS1A02G191800	green
TraesCS1A02G191900	turquoise
TraesCS1A02G192200	turquoise
TraesCS1A02G192300	cyan
TraesCS1A02G192400	turquoise
TraesCS1A02G192500	turquoise
TraesCS1A02G192600	purple
TraesCS1A02G192700	greenyellow
TraesCS1A02G192800	floralwhite
TraesCS1A02G192900	midnightblue
TraesCS1A02G193000	turquoise
TraesCS1A02G193100	yellow
TraesCS1A02G193200	darkgrey
TraesCS1A02G193300	yellow
TraesCS1A02G193400	blue
TraesCS1A02G193500	pink
TraesCS1A02G193600	turquoise
TraesCS1A02G193700	blue
TraesCS1A02G193800	turquoise
TraesCS1A02G193900	yellow
TraesCS1A02G194000	grey
TraesCS1A02G194100	lightyellow
TraesCS1A02G194200	paleturquoise
TraesCS1A02G194400	blue
TraesCS1A02G194500	grey60
TraesCS1A02G194600	yellow
TraesCS1A02G194700	blue
TraesCS1A02G194800	turquoise
TraesCS1A02G194900	turquoise
TraesCS1A02G195000	violet
TraesCS1A02G195100	grey60
TraesCS1A02G195200	grey
TraesCS1A02G195300	blue
TraesCS1A02G195312	turquoise
TraesCS1A02G195400	grey60
TraesCS1A02G195500	turquoise
TraesCS1A02G195700	grey60
TraesCS1A02G195900	turquoise
TraesCS1A02G196000	orange
TraesCS1A02G196100	turquoise
TraesCS1A02G196200	turquoise
TraesCS1A02G196300	turquoise
TraesCS1A02G196400	greenyellow
TraesCS1A02G196500	orangered4
TraesCS1A02G196600	turquoise
TraesCS1A02G196700	turquoise
TraesCS1A02G196800	blue
TraesCS1A02G196900	paleturquoise
TraesCS1A02G197000	lightsteelblue1
TraesCS1A02G197100	grey60
TraesCS1A02G197200	tan
TraesCS1A02G197300	cyan
TraesCS1A02G197400	turquoise
TraesCS1A02G197500	turquoise
TraesCS1A02G197600	brown
TraesCS1A02G197700	turquoise
TraesCS1A02G197800	turquoise
TraesCS1A02G197900	turquoise
TraesCS1A02G198000	skyblue3
TraesCS1A02G198100	yellow
TraesCS1A02G198200	turquoise
TraesCS1A02G198300	blue
TraesCS1A02G198400	turquoise
TraesCS1A02G198500	black
TraesCS1A02G198600	brown
TraesCS1A02G198700	turquoise
TraesCS1A02G198800	turquoise
TraesCS1A02G198900	royalblue
TraesCS1A02G199000	turquoise
TraesCS1A02G199100	royalblue
TraesCS1A02G199200	yellow
TraesCS1A02G199500	turquoise
TraesCS1A02G199600	magenta
TraesCS1A02G199700	blue
TraesCS1A02G199800	orange
TraesCS1A02G199900	blue
TraesCS1A02G200000	turquoise
TraesCS1A02G200100	darkturquoise
TraesCS1A02G200200	darkred
TraesCS1A02G200400	red
TraesCS1A02G200500	turquoise
TraesCS1A02G200600	yellow
TraesCS1A02G200800	yellow
TraesCS1A02G200900	blue
TraesCS1A02G201000	brown
TraesCS1A02G201100	turquoise
TraesCS1A02G201200	turquoise
TraesCS1A02G201300	blue
TraesCS1A02G201400	black
TraesCS1A02G201500	turquoise
TraesCS1A02G201600	turquoise
TraesCS1A02G201700	blue
TraesCS1A02G201800	blue
TraesCS1A02G201900	blue
TraesCS1A02G202000	turquoise
TraesCS1A02G202100	grey
TraesCS1A02G202200	midnightblue
TraesCS1A02G202300	darkgrey
TraesCS1A02G202700	magenta
TraesCS1A02G202800	lightcyan
TraesCS1A02G203000	yellow
TraesCS1A02G203100	turquoise
TraesCS1A02G203200	pink
TraesCS1A02G203300	royalblue
TraesCS1A02G203400	yellow
TraesCS1A02G203500	cyan
TraesCS1A02G203600	brown
TraesCS1A02G203700	brown
TraesCS1A02G203800	brown
TraesCS1A02G203900	red
TraesCS1A02G204200	violet
TraesCS1A02G204300	magenta
TraesCS1A02G204400	lightyellow
TraesCS1A02G204500	midnightblue
TraesCS1A02G204600	brown
TraesCS1A02G204700	turquoise
TraesCS1A02G204800	red
TraesCS1A02G204900	cyan
TraesCS1A02G205000	greenyellow
TraesCS1A02G205100	red
TraesCS1A02G205200	purple
TraesCS1A02G205300	yellow
TraesCS1A02G205400	turquoise
TraesCS1A02G205500	blue
TraesCS1A02G205600	turquoise
TraesCS1A02G205700	turquoise
TraesCS1A02G205900	turquoise
TraesCS1A02G206000	violet
TraesCS1A02G206100	navajowhite2
TraesCS1A02G206200	turquoise
TraesCS1A02G206300	skyblue3
TraesCS1A02G206400	black
TraesCS1A02G206500	grey
TraesCS1A02G206600	darkred
TraesCS1A02G206700	yellow
TraesCS1A02G206800	black
TraesCS1A02G206900	turquoise
TraesCS1A02G207000	grey
TraesCS1A02G207100	darkgrey
TraesCS1A02G207200	salmon
TraesCS1A02G207300	salmon
TraesCS1A02G207500	brown
TraesCS1A02G207600	brown
TraesCS1A02G207700	turquoise
TraesCS1A02G207800	darkred
TraesCS1A02G207900	darkorange
TraesCS1A02G208000	yellow
TraesCS1A02G208100	turquoise
TraesCS1A02G208300	turquoise
TraesCS1A02G208400	turquoise
TraesCS1A02G208500	turquoise
TraesCS1A02G208600	turquoise
TraesCS1A02G208700	greenyellow
TraesCS1A02G208800	lightcyan
TraesCS1A02G208900	skyblue3
TraesCS1A02G209000	grey60
TraesCS1A02G209100	darkgrey
TraesCS1A02G209200	blue
TraesCS1A02G209300	skyblue
TraesCS1A02G209400	lightcyan
TraesCS1A02G209500	turquoise
TraesCS1A02G209600	yellow
TraesCS1A02G209700	green
TraesCS1A02G210200	grey
TraesCS1A02G210300	turquoise
TraesCS1A02G210400	grey
TraesCS1A02G210500	greenyellow
TraesCS1A02G210600	turquoise
TraesCS1A02G210700	greenyellow
TraesCS1A02G210800	yellow
TraesCS1A02G210900	darkred
TraesCS1A02G211000	skyblue3
TraesCS1A02G211100	royalblue
TraesCS1A02G211300	green
TraesCS1A02G211400	cyan
TraesCS1A02G211500	grey60
TraesCS1A02G211600	turquoise
TraesCS1A02G211700	lightgreen
TraesCS1A02G211800	coral1
TraesCS1A02G211900	blue
TraesCS1A02G212000	darkolivegreen
TraesCS1A02G212300	lightcyan
TraesCS1A02G212400	green
TraesCS1A02G212600	green
TraesCS1A02G212700	turquoise
TraesCS1A02G212800	turquoise
TraesCS1A02G212900	turquoise
TraesCS1A02G213000	turquoise
TraesCS1A02G213100	turquoise
TraesCS1A02G213200	cyan
TraesCS1A02G213300	turquoise
TraesCS1A02G213400	turquoise
TraesCS1A02G213600	green
TraesCS1A02G213700	lightyellow
TraesCS1A02G213800	turquoise
TraesCS1A02G213900	yellow
TraesCS1A02G214100	turquoise
TraesCS1A02G214200	turquoise
TraesCS1A02G214300	turquoise
TraesCS1A02G214316	turquoise
TraesCS1A02G214400	turquoise
TraesCS1A02G214600	turquoise
TraesCS1A02G214700	salmon
TraesCS1A02G215000	midnightblue
TraesCS1A02G215100	turquoise
TraesCS1A02G215300	grey
TraesCS1A02G215400	turquoise
TraesCS1A02G215500	darkred
TraesCS1A02G215600	grey60
TraesCS1A02G215700	pink
TraesCS1A02G215800	yellow
TraesCS1A02G215900	cyan
TraesCS1A02G216100	steelblue
TraesCS1A02G216200	green
TraesCS1A02G216300	purple
TraesCS1A02G216400	magenta
TraesCS1A02G216700	turquoise
TraesCS1A02G216800	purple
TraesCS1A02G216900	turquoise
TraesCS1A02G217000	royalblue
TraesCS1A02G217100	black
TraesCS1A02G217200	turquoise
TraesCS1A02G217300	turquoise
TraesCS1A02G217400	turquoise
TraesCS1A02G217500	turquoise
TraesCS1A02G217600	grey60
TraesCS1A02G217800	turquoise
TraesCS1A02G217900	darkgrey
TraesCS1A02G218000	pink
TraesCS1A02G218100	white
TraesCS1A02G218200	skyblue
TraesCS1A02G218300	brown
TraesCS1A02G218400	grey
TraesCS1A02G218500	turquoise
TraesCS1A02G218700	turquoise
TraesCS1A02G218800	yellow
TraesCS1A02G218900	pink
TraesCS1A02G219000	turquoise
TraesCS1A02G219200	tan
TraesCS1A02G219400	turquoise
TraesCS1A02G219500	lightcyan
TraesCS1A02G219600	salmon
TraesCS1A02G219800	turquoise
TraesCS1A02G219900	purple
TraesCS1A02G220000	royalblue
TraesCS1A02G220100	darkturquoise
TraesCS1A02G220200	blue
TraesCS1A02G220300	turquoise
TraesCS1A02G220400	purple
TraesCS1A02G220500	black
TraesCS1A02G220700	midnightblue
TraesCS1A02G220800	turquoise
TraesCS1A02G220900	darkred
TraesCS1A02G221000	turquoise
TraesCS1A02G221100	turquoise
TraesCS1A02G221200	mediumpurple3
TraesCS1A02G221300	steelblue
TraesCS1A02G221400	green
TraesCS1A02G221500	yellow
TraesCS1A02G221600	green
TraesCS1A02G221700	black
TraesCS1A02G221800	black
TraesCS1A02G221900	honeydew1
TraesCS1A02G222000	turquoise
TraesCS1A02G222200	turquoise
TraesCS1A02G222500	blue
TraesCS1A02G222600	tan
TraesCS1A02G222700	green
TraesCS1A02G222800	turquoise
TraesCS1A02G222900	turquoise
TraesCS1A02G223000	turquoise
TraesCS1A02G223100	turquoise
TraesCS1A02G223200	grey
TraesCS1A02G223300	grey
TraesCS1A02G223600	saddlebrown
TraesCS1A02G223700	yellow
TraesCS1A02G223800	turquoise
TraesCS1A02G223900	turquoise
TraesCS1A02G224000	turquoise
TraesCS1A02G224200	skyblue
TraesCS1A02G224300	darkturquoise
TraesCS1A02G224500	skyblue
TraesCS1A02G224600	lightcyan
TraesCS1A02G224700	turquoise
TraesCS1A02G224800	turquoise
TraesCS1A02G224900	lightyellow
TraesCS1A02G225000	pink
TraesCS1A02G225100	turquoise
TraesCS1A02G225200	skyblue3
TraesCS1A02G225300	lightyellow
TraesCS1A02G225600	turquoise
TraesCS1A02G225700	lightyellow
TraesCS1A02G225800	greenyellow
TraesCS1A02G226000	red
TraesCS1A02G226100	turquoise
TraesCS1A02G226200	purple
TraesCS1A02G226300	turquoise
TraesCS1A02G226400	yellow
TraesCS1A02G226500	grey
TraesCS1A02G226600	turquoise
TraesCS1A02G226700	turquoise
TraesCS1A02G226800	orange
TraesCS1A02G226900	grey
TraesCS1A02G227000	turquoise
TraesCS1A02G227200	grey
TraesCS1A02G227300	darkgrey
TraesCS1A02G227400	lightsteelblue1
TraesCS1A02G227500	blue
TraesCS1A02G227600	grey
TraesCS1A02G227700	greenyellow
TraesCS1A02G228000	lightcyan
TraesCS1A02G228100	turquoise
TraesCS1A02G228200	green
TraesCS1A02G228300	grey60
TraesCS1A02G228400	cyan
TraesCS1A02G228500	magenta
TraesCS1A02G228600	turquoise
TraesCS1A02G228700	turquoise
TraesCS1A02G228800	coral1
TraesCS1A02G228900	turquoise
TraesCS1A02G229000	green
TraesCS1A02G229100	blue
TraesCS1A02G229300	tan
TraesCS1A02G229400	turquoise
TraesCS1A02G229500	turquoise
TraesCS1A02G229600	turquoise
TraesCS1A02G229700	turquoise
TraesCS1A02G229800	turquoise
TraesCS1A02G229900	turquoise
TraesCS1A02G230000	turquoise
TraesCS1A02G230100	turquoise
TraesCS1A02G230200	royalblue
TraesCS1A02G230300	turquoise
TraesCS1A02G230400	brown
TraesCS1A02G230500	brown
TraesCS1A02G230600	yellow
TraesCS1A02G230900	turquoise
TraesCS1A02G231000	turquoise
TraesCS1A02G231100	turquoise
TraesCS1A02G231400	grey
TraesCS1A02G231500	brown
TraesCS1A02G231700	blue
TraesCS1A02G231800	lightsteelblue1
TraesCS1A02G231900	cyan
TraesCS1A02G232000	turquoise
TraesCS1A02G232200	red
TraesCS1A02G232300	violet
TraesCS1A02G232400	turquoise
TraesCS1A02G232500	salmon
TraesCS1A02G232600	darkorange
TraesCS1A02G232800	paleturquoise
TraesCS1A02G232900	lightyellow
TraesCS1A02G233100	turquoise
TraesCS1A02G233200	turquoise
TraesCS1A02G233300	greenyellow
TraesCS1A02G233400	turquoise
TraesCS1A02G233500	turquoise
TraesCS1A02G233600	turquoise
TraesCS1A02G233700	turquoise
TraesCS1A02G233800	red
TraesCS1A02G233900	grey
TraesCS1A02G234000	lightsteelblue1
TraesCS1A02G234100	saddlebrown
TraesCS1A02G234200	yellow
TraesCS1A02G234300	brown
TraesCS1A02G234400	turquoise
TraesCS1A02G234500	coral2
TraesCS1A02G234600	pink
TraesCS1A02G234700	white
TraesCS1A02G234800	grey
TraesCS1A02G234900	yellow
TraesCS1A02G235000	turquoise
TraesCS1A02G235100	blue
TraesCS1A02G235200	yellow
TraesCS1A02G235300	turquoise
TraesCS1A02G235500	turquoise
TraesCS1A02G235600	turquoise
TraesCS1A02G235700	blue
TraesCS1A02G235800	turquoise
TraesCS1A02G235900	orange
TraesCS1A02G236000	blue
TraesCS1A02G236100	black
TraesCS1A02G236300	turquoise
TraesCS1A02G236400	brown
TraesCS1A02G236500	turquoise
TraesCS1A02G236600	turquoise
TraesCS1A02G236700	turquoise
TraesCS1A02G236900	lightcyan
TraesCS1A02G237000	blue
TraesCS1A02G237100	turquoise
TraesCS1A02G237200	turquoise
TraesCS1A02G237300	skyblue
TraesCS1A02G237400	brown
TraesCS1A02G237500	brown
TraesCS1A02G237600	brown
TraesCS1A02G237700	red
TraesCS1A02G237800	turquoise
TraesCS1A02G238000	turquoise
TraesCS1A02G238100	blue
TraesCS1A02G238400	violet
TraesCS1A02G238500	darkolivegreen
TraesCS1A02G238600	sienna3
TraesCS1A02G238700	black
TraesCS1A02G238800	black
TraesCS1A02G238900	turquoise
TraesCS1A02G239000	pink
TraesCS1A02G239100	pink
TraesCS1A02G239200	magenta
TraesCS1A02G239300	turquoise
TraesCS1A02G239400	lightcoral
TraesCS1A02G239500	brown
TraesCS1A02G239600	turquoise
TraesCS1A02G239700	turquoise
TraesCS1A02G239800	turquoise
TraesCS1A02G240000	blue
TraesCS1A02G240100	turquoise
TraesCS1A02G240200	turquoise
TraesCS1A02G240300	turquoise
TraesCS1A02G240400	turquoise
TraesCS1A02G240500	red
TraesCS1A02G240600	turquoise
TraesCS1A02G240900	paleturquoise
TraesCS1A02G241000	pink
TraesCS1A02G241100	blue
TraesCS1A02G241200	blue
TraesCS1A02G241300	turquoise
TraesCS1A02G241400	ivory
TraesCS1A02G241500	sienna3
TraesCS1A02G241600	turquoise
TraesCS1A02G241700	turquoise
TraesCS1A02G241800	greenyellow
TraesCS1A02G241900	turquoise
TraesCS1A02G242000	brown
TraesCS1A02G242100	brown
TraesCS1A02G242200	turquoise
TraesCS1A02G242300	turquoise
TraesCS1A02G242400	darkgrey
TraesCS1A02G242500	turquoise
TraesCS1A02G242600	lavenderblush3
TraesCS1A02G242800	tan
TraesCS1A02G242900	turquoise
TraesCS1A02G243000	grey60
TraesCS1A02G243100	blue
TraesCS1A02G243200	darkolivegreen
TraesCS1A02G243300	turquoise
TraesCS1A02G243400	turquoise
TraesCS1A02G243500	lightcyan
TraesCS1A02G243700	turquoise
TraesCS1A02G243800	white
TraesCS1A02G243900	blue
TraesCS1A02G244100	turquoise
TraesCS1A02G244200	turquoise
TraesCS1A02G244300	saddlebrown
TraesCS1A02G244400	turquoise
TraesCS1A02G244500	royalblue
TraesCS1A02G244600	yellow
TraesCS1A02G244700	turquoise
TraesCS1A02G244900	ivory
[truncated: 85,582 more rows]
