# Supplementary material for: Identification of candidate regulators of the response to early heat stress in climate-adapted wheat landraces via transcriptomic and co-expression network analyses
Source: Front Plant Sci. 2024 Jan 3;14:1252885. doi: 10.3389/fpls.2023.1252885 (PMC10791870; doi:10.3389/fpls.2023.1252885)
Supplement: Supplementary file 7 [file DataSheet_6.xlsx]

## Sheet: Legend
Table S6: Results of the gene ontology term enrichment analysis for each module in the co-expression network, besides the grey pseudo-module. The most significantly enriched GO term is provided, as well as any significantly enriched GO terms related to the stress response.

## Sheet: GO Enrichment
Module	Module Size	Enriched GO Terms
antiquewhite4	87	ADP binding (6e-05)
bisque4	160	NA
black	2415	Regulation of RNA biosynthetic process (6.9e-24), Response to water (0.017)
blue	6821	Prosthetic group metabolic process (0.027)
brown	4023	Amino sugar catabolic process (9e-15), Response to oxidative stress (4.7e-11)
brown4	163	Transferase activtiy (0.045)
coral1	91	NA
coral2	86	Protein heterodimerization activity (6.9e-05)
cyan	1704	L-phenylalanine catabolic process (0.0057)
darkgreen	804	Multi-multicellular organism process (9.5e-13), Response to stress (0.0013)
darkgrey	676	Cellular carbohydrate metabolic process (3.7e-06), Cell wall biogenesis (0.012)
darkmagenta	382	NA
darkolivegreen	384	Sexual reproduction (0.0001), Response to oxidative stress (0.008)
darkorange	637	Protein phosphorylation (5.2e-20)
darkorange2	167	NA
darkred	934	Regulation of RNA biosynthetic process (0.036)
darkseagreen4	96	Oxidoreductase activity, acting on paired donors, with incorporation or reduction of molecular oxygen (0.0042)
darkslateblue	155	Oxidation-reduction process (0.0028)
darkturquoise	688	Carbohydrate metabolic process (0.0081)
floralwhite	169	Regulation of nucleobase-containing compound metabolic process (5.7e-05)
green	2766	Response to oxidative stress (1.2e-09), Response to stress (0.0032)
greenyellow	2007	Transferase activity, transferring acyl groups other than amino-acyl groups (0.0009)
grey60	1360	Phosphate-containing compound metabolic process (1.8e-07)
honeydew1	96	Iron ion binding (0.013)
indianred4	36	Organic substance biosynthetic process (0.039)
ivory	169	NA
lavenderblush3	98	Protein phosphorylation (3.1e-05)
lightcoral	41	Protein phosphorylation (8.4e-06)
lightcyan	1555	Nucleosome organization (3.4e-09), Response to stress (0.032)
lightcyan1	182	NA
lightgreen	1243	Protein phosphorylation (0.0024)
lightpink4	103	ADP binding (0.00013)
lightsteelblue	49	Organelle (0.045)
lightsteelblue1	186	Small molecule binding (0.012)
lightyellow	1110	Cysteine-type peptidase activity (0.015)
magenta	2176	Protein binding (5e-06)
maroon	111	NA
mediumorchid	85	NA
mediumpurple2	54	Single-organism biosynthetic process (9.6e-06)
mediumpurple3	193	Vesicle-mediated transport (0.018)
midnightblue	1598	Photosynthetic electron transport chain (4.7e-06)
navajowhite2	116	NA
orange	650	Cotranslational protein targeting to membrane (0.0004)
orangered3	57	NA
orangered4	195	Single-organism metabolic process (3.9e-08)
paleturquoise	435	Oxidation-reduction process (0.0019)
palevioletred3	121	Pollen-pistil interaction (0.0054)
pink	2202	Photosynthesis (5.8e-18), Cellular response to stimulus (0.0011)
plum	58	NA
plum1	236	NA
plum2	151	NA
purple	2161	Regulation of primary metabolic process (0.013)
red	2501	Response to biotic stimulus (3.6e-14), Response to stress (1.7e-05)
royalblue	1004	Response to wounding (0.013)
saddlebrown	591	Nucleosome assembly (0.00054)
salmon	1761	Protein phosphorylation (5.9e-08), Response to stress (0.0018)
salmon4	124	NA
sienna3	372	NA
skyblue	614	Nitrogen compound transport (0.00048)
skyblue1	74	Nucleic acid binding (3.2e-07)
skyblue2	85	NA
skyblue3	285	ADP binding (0.042)
steelblue	542	Protein disulfide oxidoreductase activity (0.00037)
tan	1840	Regulation of primary metabolic process (0.0048)
thistle1	128	Photosynthesis (2.5e-13)
thistle2	130	Cellular component assembly (0.034)
turquoise	26420	Translation (9e-128), Cellular response to stress (1.2e-17)
violet	429	Oxidoreductase activity, acting on the CH-OH group of donors, NAD or NADP as acceptor (0.0045)
white	620	Phosphorylation (0.003)
yellow	3993	Cellular protein localization (1.3e-29), Response to heat (0.021)
yellow4	75	Single-organism metabolic process (0.013)
yellowgreen	310	NA
