# Supplementary material for: Identification of candidate regulators of the response to early heat stress in climate-adapted wheat landraces via transcriptomic and co-expression network analyses
Source: Front Plant Sci. 2024 Jan 3;14:1252885. doi: 10.3389/fpls.2023.1252885 (PMC10791870; doi:10.3389/fpls.2023.1252885)
Supplement: Supplementary file 8 [file DataSheet_7.xlsx]

## Sheet: Legend
Table S7: qRT-PCR primers

## Sheet: qPCR-Primers
Primer name	Sequence (5’-3’)	Reference
TraesCS1B02G384900_F1_qPCR	CTTCGGGCGAGCTCTTCGCG	This study
TraesCS1B02G384900_R1_qPCR	CCGATGCAGGATACGACGCG	This study
TraesCS3B02G409300_F1_qPCR	GGAGGTCGAGGACTTCTCGC	This study
TraesCS3B02G409300_R2_qPCR	GAAGGCGTCGCTGTCATCTGG	This study
TraesCS4D02G212300_F1_qPCR	CAGCGGCAGTCTCGTCCCG	This study
TraesCS4D02G212300_R1_qPCR	CCACCTCCACCTTCACCTCC	This study
TaTub_A F	GGTGCTTACCGCCAGCTCTT	Guo et al., 2011
TaTub_A R	TGGTGTAATGACCACGGGCG	Guo et al., 2011
Guo H, Zhang H, Li Y, Ren J, Wang X, Niu H, Yin J. Identification of changes in wheat (Triticum aestivum L.) seeds proteome in response to anti-trx s gene. PLoS One. 2011;6(7):e22255. doi: 10.1371/journal.pone.0022255
